# Supplementary material
Source: PubMed Central journal article supplement (PMC6237471)
Supplement: jciinsight-3-120596-s158.pdf [file jciinsight-3-120596-s158.pdf]

# **Myeloid HO-1 Modulates Macrophage Polarization and Protects Against Ischemia-Reperfusion Injury**

Zhang M<sup>1</sup>, Nakamura K<sup>2</sup>, Kageyama S<sup>2</sup>, Lawal AO<sup>1</sup>, Gong K-W<sup>1</sup>, Bhetraratana M<sup>1</sup>, Fujii  
T<sup>2</sup>, Sulaiman D<sup>1</sup>, Hirao H<sup>2</sup>, Bolisetty S<sup>3</sup>, Kupiec-Weglinski JW<sup>2</sup>, Araujo JA<sup>1,4</sup>

From the Department of Medicine, Division of Cardiology, David Geffen School of  
Medicine, University of California, Los Angeles, CA <sup>1</sup>, Department of Surgery, David  
Geffen School of Medicine, University of California, Los Angeles, CA <sup>2</sup>, Department of  
Medicine, University of Alabama, AL <sup>3</sup>, and Department of Environmental Health  
Sciences, Fielding School of Public Health, University of California, Los Angeles, CA <sup>4</sup>.

## **Table of contents**

|                |   |
|----------------|---|
| Figure S1----- | 1 |
| Figure S2----- | 2 |
| Figure S3----- | 3 |
| Figure S4----- | 4 |
| Figure S5----- | 5 |
| Figure S6----- | 6 |
| Figure S7----- | 7 |
| Table S1-----  | 8 |
| Table S2-----  | 8 |
| Table S3-----  | 9 |

# Supplemental Figure 1

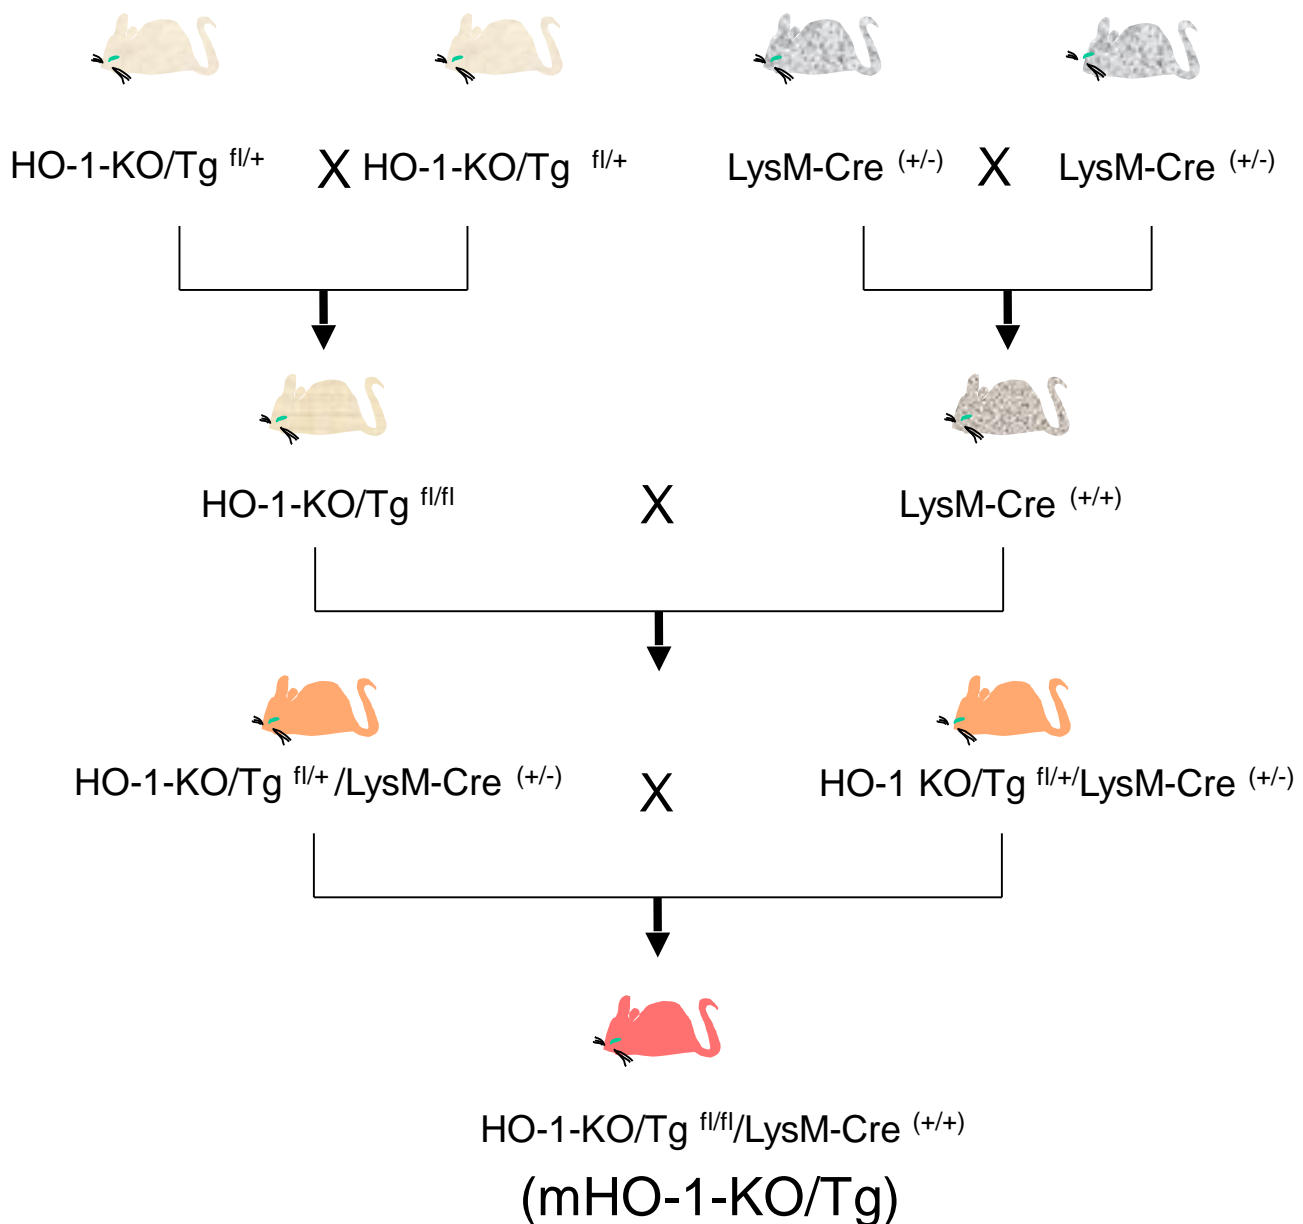

**Figure S1. Strategy for the generation of mHO-1-KO mice and mHO-1-Tg mice.** Breeding strategy employed to develop myeloid specific HO-1 knockout (mHO-1-KO) mice and myeloid specific HO-1 transgenic (mHO-1-Tg) mice. Both mHO-1-KO and mHO-1-Tg mice were obtained via successive cross-breeding strategy as shown. Homozygous floxed HO-1-KO or Tg ( $HO-1-KO^{fl/fl}/HO-1-Tg^{fl/fl}$ ) mice and homozygous LysM-Cre ( $LysM-Cre^{+/+}$ ) mice were crossed to obtain heterozygous mice for both alleles,  $HO-1-KO/Tg^{fl/+}$  and  $LysM-Cre^{+/-}$ . Further, heterozygous floxed  $HO-1-KO/Tg^{fl/+}$  mice ( $HO-1^{fl/+} LysM-Cre^{+/-}$ ) were crossed to obtain homozygous myeloid specific floxed  $HO-1-KO/Tg$  mice ( $HO-1-KO/Tg^{fl/fl} LysM-Cre^{+/-}$ ).

# Supplemental Figure 2

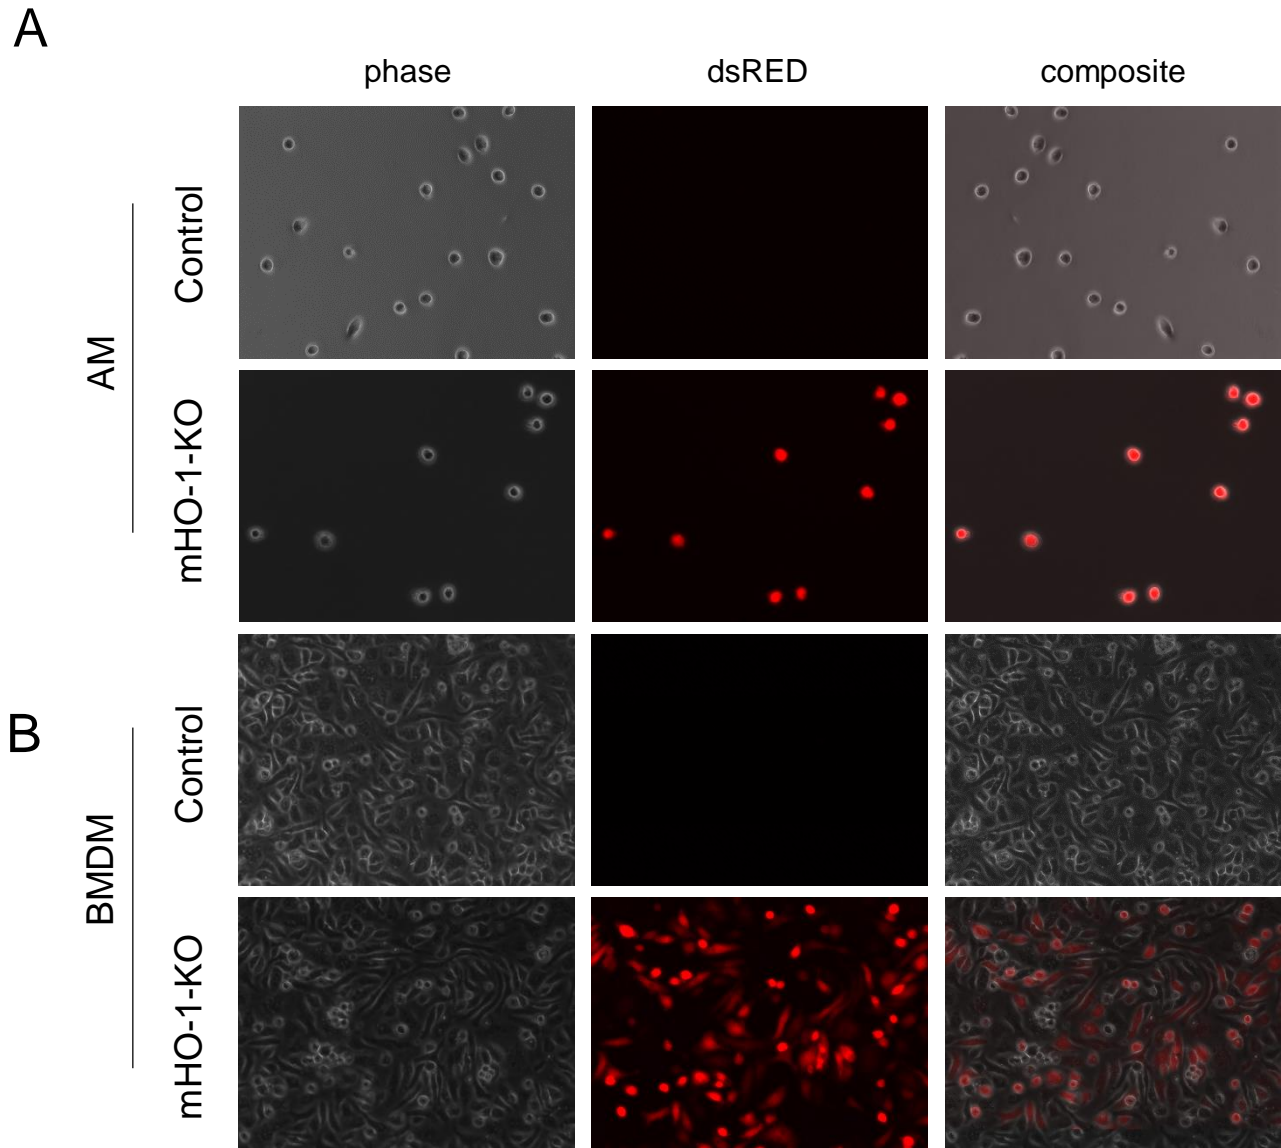

**Figure S2. Deletion efficiency of HO-1 in Alveolar and Bone marrow derived macrophages (BMDMs).**

dsRED fluorescence detection in macrophages from mHO-1-KO mice. A: Alveolar macrophages (AM). Top: Floxed HO-1 (HO-1-KO fl/fl) controls. Bottom: mHO-1-KO mice. 200X. B: BMDMs. Top: Floxed HO-1 (HO-1-KO fl/fl) controls. Bottom: mHO-1-KO mice. magnification,  $\times 200$ ; Phase: phase contrast. dsRED: red fluorescence channel. Composite: overlay images from phase contrast and red fluorescence channel.

# Supplemental Figure 3

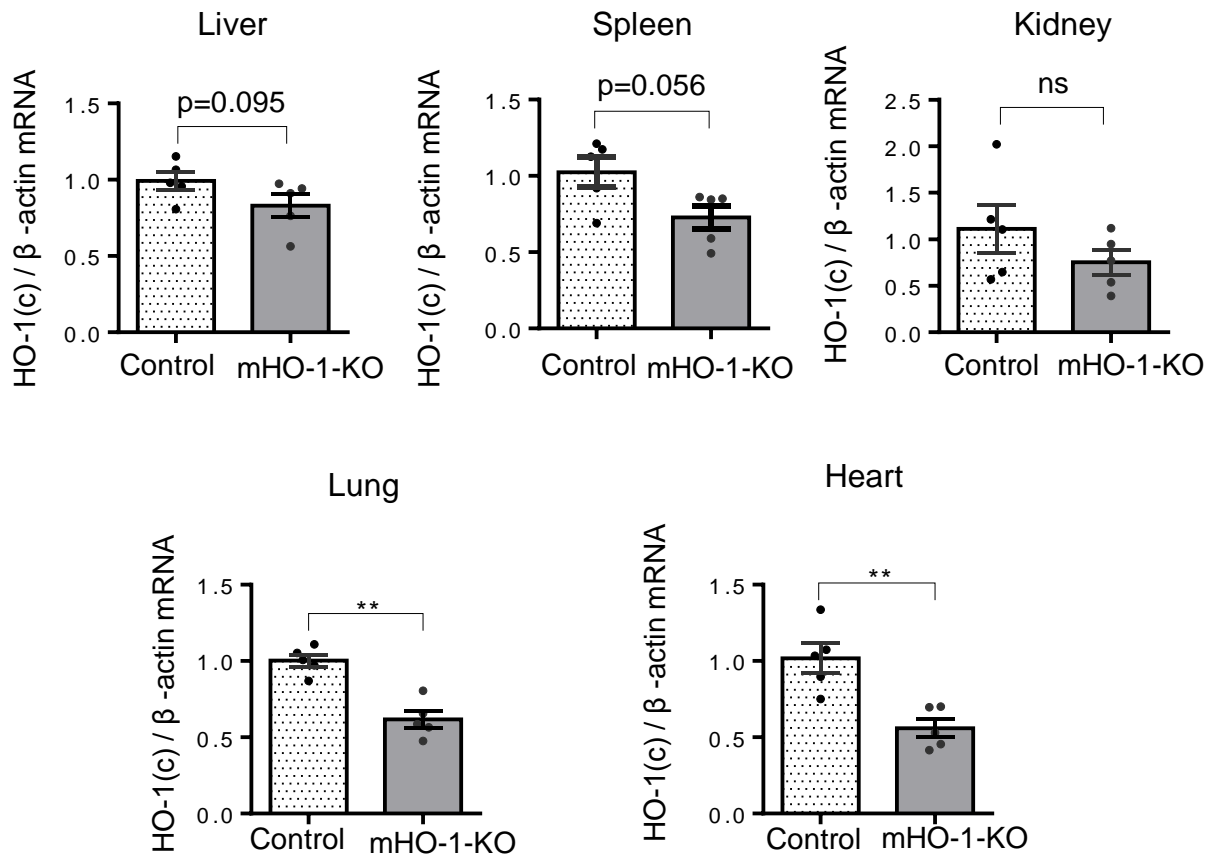

**Figure S3. HO-1 mRNA expression in tissues from mHO-1-KO mice vs. controls.** HO-1 mRNA levels in tissue homogenate of liver, spleen, lung, kidney and heart from mHO-1-KO mice vs. controls (n=5/group). Data were normalized to  $\beta$ -actin gene expression, and shown mean  $\pm$  SEM (scatter dot blot). Statistical analyses were done with two-tailed Mann-Whitney U test. ns: not significant; \*\*p < 0.01

# Supplemental Figure 4

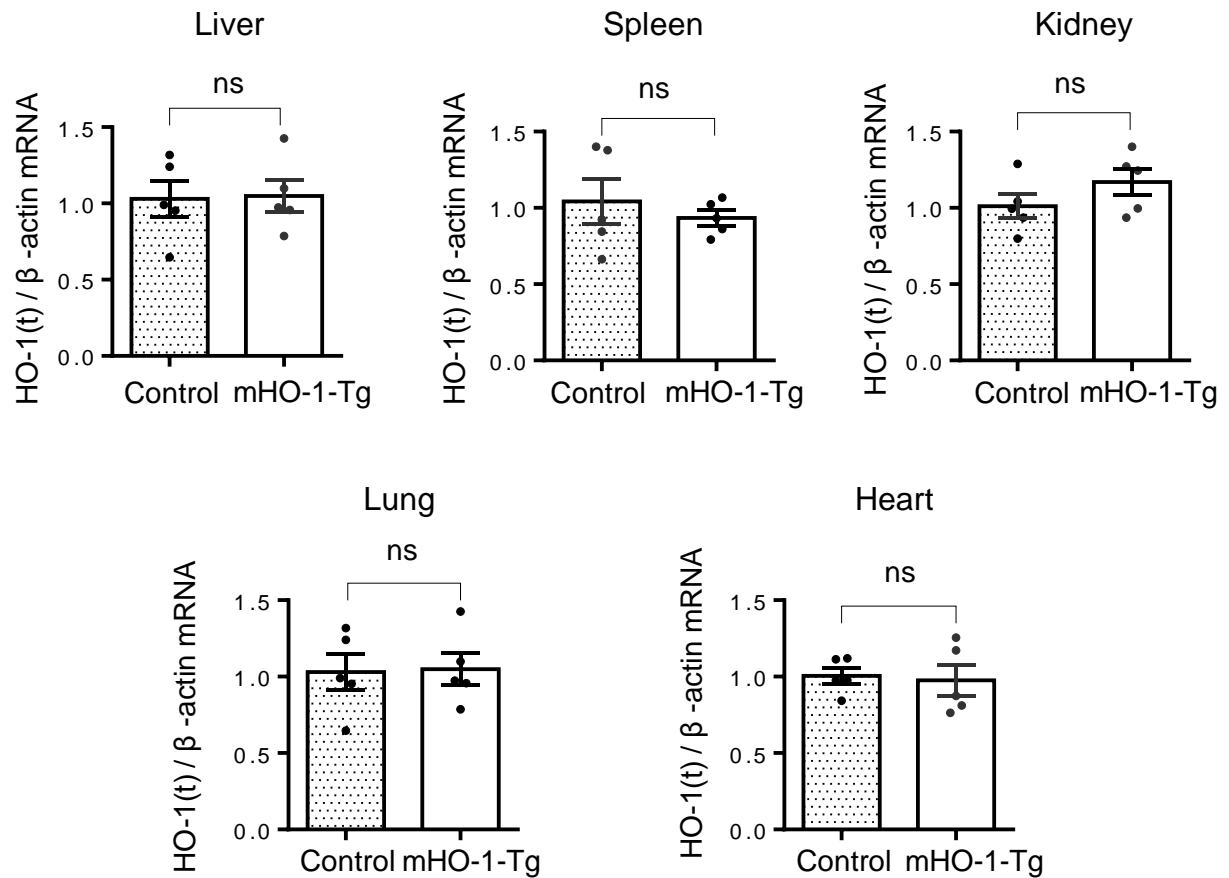

**Figure S4. HO-1 mRNA expression in tissues from mHO-1-Tg mice vs. controls.**

HO-1 mRNA levels in tissue homogenate of liver, spleen, lung, kidney and heart from mHO-1-Tg mice vs. controls (n=5/group). Data were normalized to  $\beta$ -actin gene expression, and shown as mean  $\pm$  SEM (scatter dot blot). Statistical analyses were done with two-tailed Mann-Whitney U test. ns: not significant

# Supplemental Figure 5

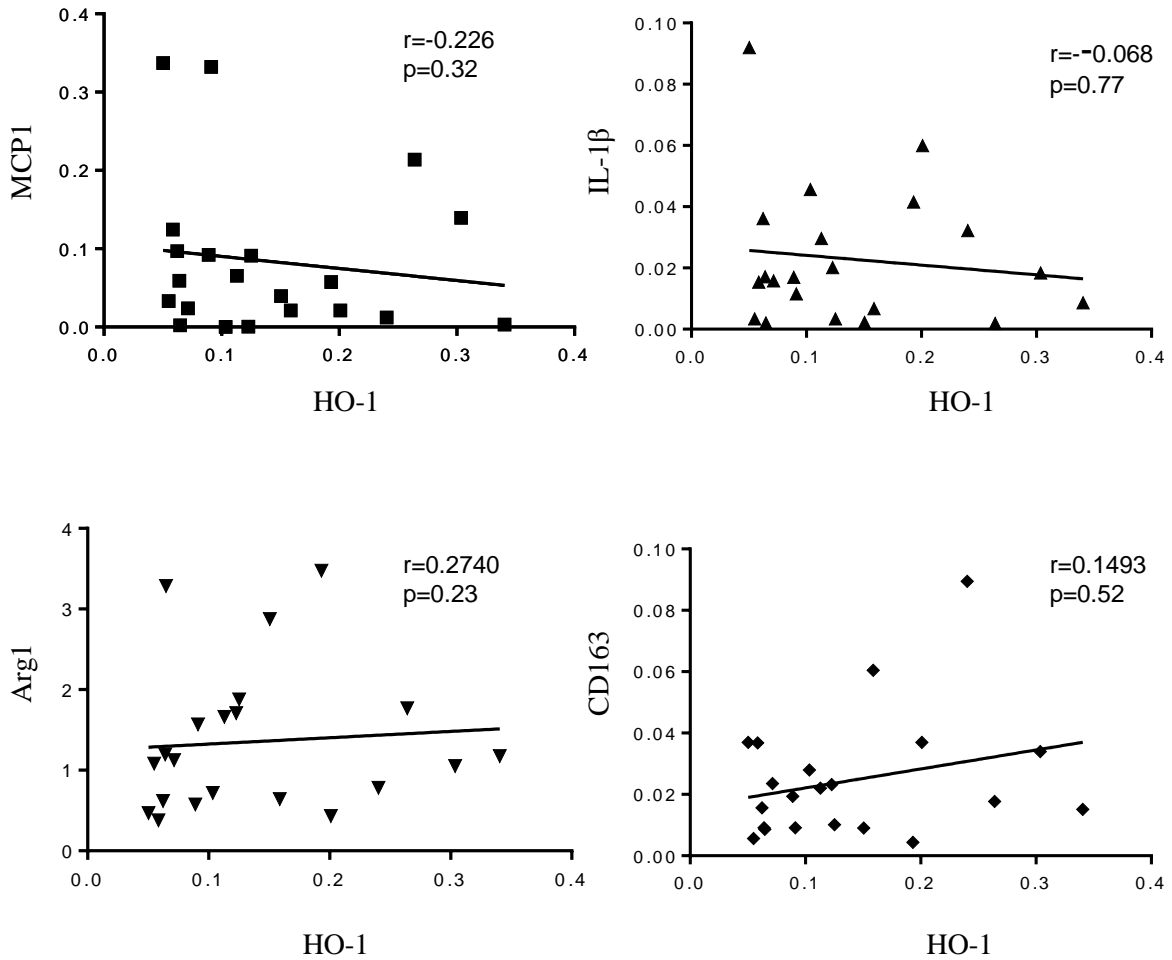

**Figure S5. The correlation between human HO-1 and cytokine expression in post transplantation liver biopsies.**

The correlations of gene expression between HO-1 and proinflammatory cytokines MCP-1 and IL-1 $\beta$  and anti-inflammatory cytokines Arg1 and CD163 expression in post transplantation liver biopsy samples were analyzed with non-parametric spearman method in Graphpad prism 6 (n = 21, 11 low HO-1 and 10 high HO-1).

# Supplemental Figure 6

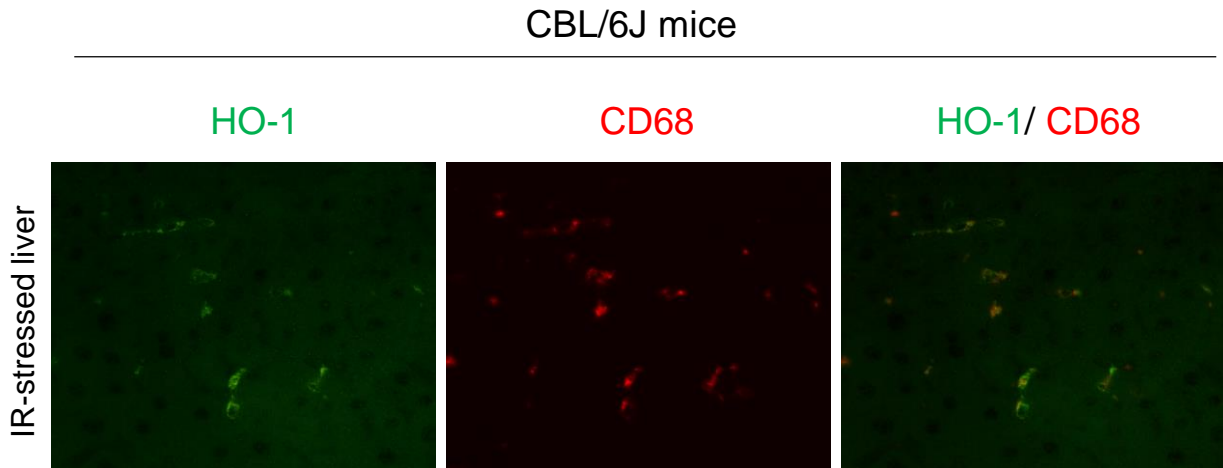

**Figure S6. HO-1 localization in IR-stressed liver.**

Immunofluorescence staining of HO-1 (green, left column), CD68 for hepatic macrophages (red, middle column) and merged images (right column), IR-stressed livers. Representative of three experiments is shown. Magnification 400X

# Supplemental Figure 7

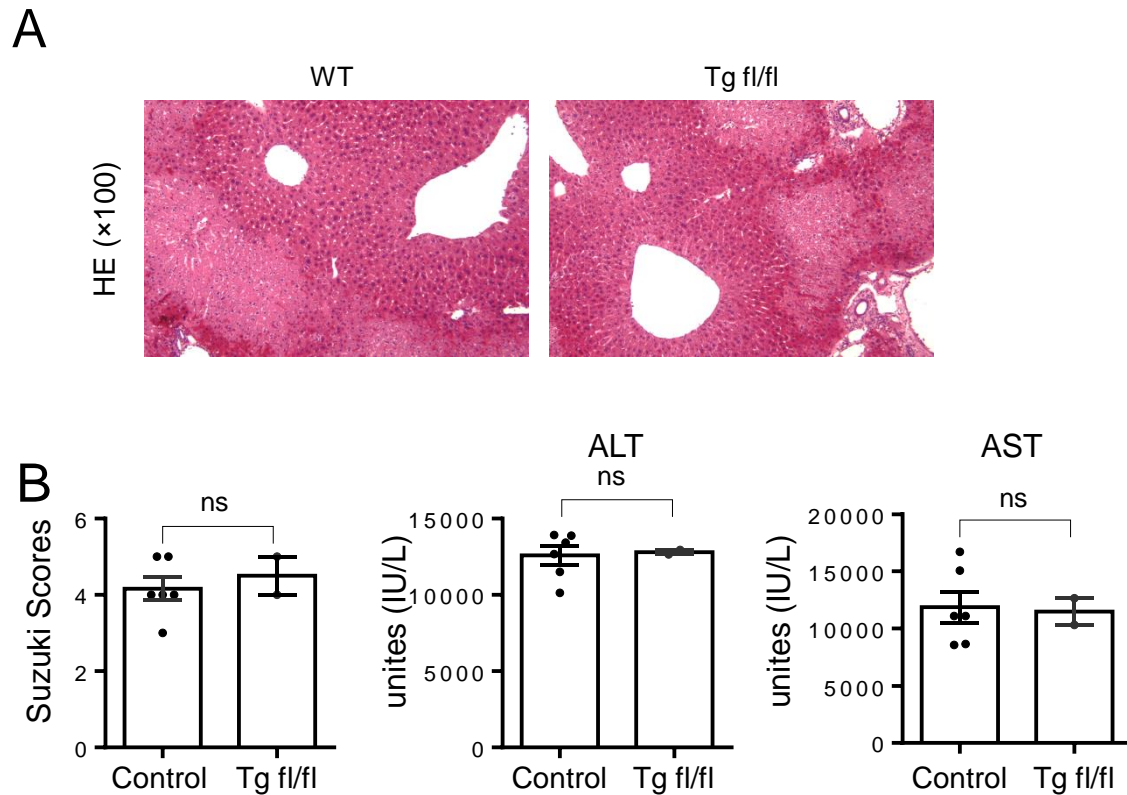

**Figure S7. Comparisons of floxed HO-1-Tg and wild-type mice.**

A. Liver histology of C57BL/6 wild-type (WT) and floxed HO-1-Tg (Tg fl/fl) after liver IRI. Representative section (magnification, ×100). B. Suzuki's histological grading of liver IRI (left). Serum ALT levels (Middle). Serum AST levels (right). (n=8, 6 control, 2 Tg fl/fl). Data are shown as mean ± SEM (scatter dot blot). Statistical analyses were done with two tailed Mann-Whitney U test. ns: not significant



**Table S1: Genotyping primers, using agarose gel electrophoresis**

| Primer name                 | Primer sequence                         |
|-----------------------------|-----------------------------------------|
| Mouse <i>Hmox1</i> -g62145r | 5'- GTC TGT AAT CCT AGC ACT CGA A-3'    |
| Mouse <i>Hmox1</i> -g61822f | 5'- CTC ACT ATG CAA CTC TGT TGG AGG -3' |
| DsRed-N2                    | 5'- GGA AGG ACA GCT TCT TGT AGT CG -3'  |
| pLysM-FP1                   | 5'- CTT GGG CTG CCA GAA TTT CTC -3'     |
| LysM-RP2                    | 5'- CCT CAC CCC AGC ATC TCT AAT TC -3'  |
| VE-Cad-Cre-R                | 5'- ATCACTCGTTGCATCGACCGGTAA -3'        |
| Human <i>HMOX1</i> 42F      | 5'- GGG TGA TAG AAG AGG CCA AGA -3'     |
| Human <i>HMOX1</i> 81R      | 5'- CTT GTT GCG CTC AAT CTC CT -3'      |

**Table S2: Genotyping primers using Roche UPL probes and real-time PCR**

| Primer name                | Primer sequence                   |
|----------------------------|-----------------------------------|
| Human <i>HMOX1</i> (101)fp | 5' GGC CTC CCT GTA CCA CAT C 3'   |
| Human <i>HMOX1</i> (101)rp | 5' AGA CTG GGC TCT CCT TGT TG 3'  |
| Mouse <i>Gja5</i> (6)fp    | 5' GGC TAC CAG AAG GTG AGC AG 3'  |
| Mouse <i>Gja5</i> (6)rp    | 5' AGG CAG GGA CAT CGT GTT AT 3'  |
| Mouse <i>Hmox1</i> (17)fp  | 5' AGG CTA AGA CCG CCT TCC T 3    |
| Mouse <i>Hmox1</i> (17)rp  | 5' TGT GTT CCT CTG TCA GCA TCA 3' |
| uniHO1 (49/134)fp          | 5'CAT GCC CCA GGA TTT GTC 3'      |
| uniHO1 (49/134)rp          | 5' TCA TGA ACT CAG CAT TCT C 3'   |
| Mouse <i>Actb</i> (56)fp   | 5' AAG GCC AAC CGT GAA AAG AT 3'  |
| Mouse <i>Actb</i> (56)rp   | 5' GTG GTA CGA CCA GAG GCA TAC 3' |

**Table S3: Primers used for gene expression**

| Primer name                             | Primer sequence                 |
|-----------------------------------------|---------------------------------|
| Mouse <i>Cxcl10fp</i>                   | 5'-CCAGAATCGAAGGCCATCAA-3'      |
| Mouse <i>Cxcl10rp</i>                   | 5'-CATTTCCTTGCTAACTGCTTTTCAG-3' |
| Mouse <i>Mcp-1 fp</i>                   | 5'- CATCCACGTGTTGGCTCA-3'       |
| Mouse <i>Mcp-1 rp</i>                   | 5'- GATCATCTTGCTGGTGAATGAGT-3'  |
| Mouse <i>IL1 <math>\beta</math> fp</i>  | 5'-TGTAATGAAAGACGGCACACC-3'     |
| Mouse <i>IL1 <math>\beta</math> rp</i>  | 5'-TCTTCTTTGGGTATTGCTTGG-3      |
| Mouse <i>Arg1 fp</i>                    | 5'-GAATGGAAGAGTCAGTGTGG-3'      |
| Mouse <i>Arg1 rp</i>                    | 5'-AATGACACATAGGTCAGGGT-3       |
| Mouse <i>Cd163 fp</i>                   | 5'-GACGACAGATTCAGCGACTT-3'      |
| Mouse <i>Cd163 rp</i>                   | 5'-CCGAGGATTTTCAGCAAGTCCA-3'    |
| Human <i>CXCL10 fp</i>                  | 5'-GCTGCCGTCATTTTCTGC-3'        |
| Human <i>CXCL10 rp</i>                  | 5'-TCTCACTGGCCCGTCATC-3'        |
| Human <i>MCP-1 fp</i>                   | 5'-TTCTGTGCCTGCTGCTCAT-3'       |
| Human <i>MCP-1 rp</i>                   | 5'-GGGGCATTGATTGCATCT-3'        |
| Human <i>IL-1 <math>\beta</math> fp</i> | 5'-CTGTCCTGCGTGTTGAAAGA-3'      |
| Human <i>IL-1 <math>\beta</math> rp</i> | 5'-TTGGGTAATTTTTGGGATCTACA-3'   |
| Human <i>ARG1 fp</i>                    | 5'-GGCAAGGTGATGGAAGAAAC-3'      |
| Human <i>ARG1 rp</i>                    | 5'-AGTCCGAAACAAGCCAAGGT-3'      |
| Human <i>CD163 fp</i>                   | 5'-GGATCTGCTGACTTCAGAAG-3'      |
| Human <i>CD163 rp</i>                   | 5'-CTCCTTGTCTGTTCTCCTCAA-3'     |
| Human <i>CD80 fp</i>                    | 5'- AAACTCGCATCTACTGGCAAA-3'    |
| Human <i>CD80 rp</i>                    | 5'- GGTTCTTGTAICTCGGGCCATA-3'   |
